# Supplementary material for: Differential Expression of CD49a and CD49b Determines Localization and Function of Tumor-Infiltrating CD8+ T Cells
Source: Oxford University Press journal article supplement (doi:10.1158/2326-6066.cir-20-0427), 2021-02-22
Supplement: 23266066cir200427-sup-supplemental-data-final-engelhard.docx [file 23266066cir200427-sup-supplemental-data-final-engelhard.docx]

| **Supplementary Table S1: Differential cytokine and chemokine expression by BRPKp110 and B16-OVA tumors** | | | | | | | |
| --- | --- | --- | --- | --- | --- | --- | --- |
| Cytokine | BRPKp110a | SD | B16-OVA a | SD | Fold change | P-value (Welch's corrected T-test) | P-value (unpaired T-test) |
| IL-12/IL-23p40 | 63005 | 34510 | 25452 | 5172 | 2.5 | 0.12 | 0.04 |
| IL-33 | 22718 | 9837 | 3242 | 3470 | 7.0 | 0.02 | 0.00 |
| TGFβ1 | 17258 | 3118 | 11960 | 2972 | 1.4 | 0.04 | 0.04 |
| CXCL1 | 16817 | 11050 | 904 | 682 | 18.6 | 0.06 | 0.01 |
| IL-1β | 2422 | 2242 | 258 | 54 | 9.4 | 0.15 | 0.06 |
| TGFβ3 | 1915 | 373 | 355 | 145 | 5.4 | 0.00 | <0.0001 |
| TGFβ2 | 1162 | 190 | 474 | 140 | 2.5 | 0.02 | 0.01 |
| TNFα | 1005 | 616 | 672 | 83 | 1.5 | 0.36 | 0.26 |
| IL-4 | 915 | 1143 | 8 | 5 | 111.2 | 0.21 | 0.11 |
| IL-2 | 519 | 243 | 68 | 49 | 7.6 | 0.03 | 0.01 |
| GM-CSF | 316 | 200 | 75 | 11 | 4.2 | 0.09 | 0.03 |
| IL-21 | 170 | 82 | 95 | 94 | 1.8 | 0.44 | 0.36 |
|  |  |  |  |  |  |  |  |
| CCL4 | 10483 | 10213 | 11229 | 6922 | 0.9 | 0.91 | 0.90 |
| IL-10 | 213 | 79 | 248 | 60 | 0.9 | 0.50 | 0.48 |
| IL-6 | 2950 | 1336 | 4132 | 1073 | 0.7 | 0.20 | 0.18 |
| IL-15 | 1318 | 466 | 2341 | 1692 | 0.6 | 0.26 | 0.28 |
| CCL3 | 16549 | 12606 | 35488 | 15889 | 0.5 | 0.09 | 0.09 |
| IFNγ | 330 | 184 | 812 | 183 | 0.4 | 0.01 | 0.01 |
| IL-27p28/IL-30 | 699 | 352 | 1995 | 1034 | 0.4 | 0.05 | 0.05 |
| CXCL10 | 122792 | 129288 | 368353 | 210584 | 0.3 | 0.07 | 0.08 |
| IL-31 | 1270 | 848 | 7454 | 7715 | 0.2 | 0.15 | 0.16 |
| VEGF | 325 | 270 | 6971 | 3022 | 0.0 | 0.01 | 0.00 |
| CCL2 | NDb | NAc | 29722 | 20513 | NA | NA | NA |

aAll values are in pg/gram of tumor, and represent the mean of individual samples from n=4 (BRPKp110) and n=5 (B16-OVA) tumor lysates prepared as described in Methods.

bNot detected

cNot applicable

| **Supplementary Table S2. Antibodies used for flow cytometry and immunofluorescent staining** |
| --- |


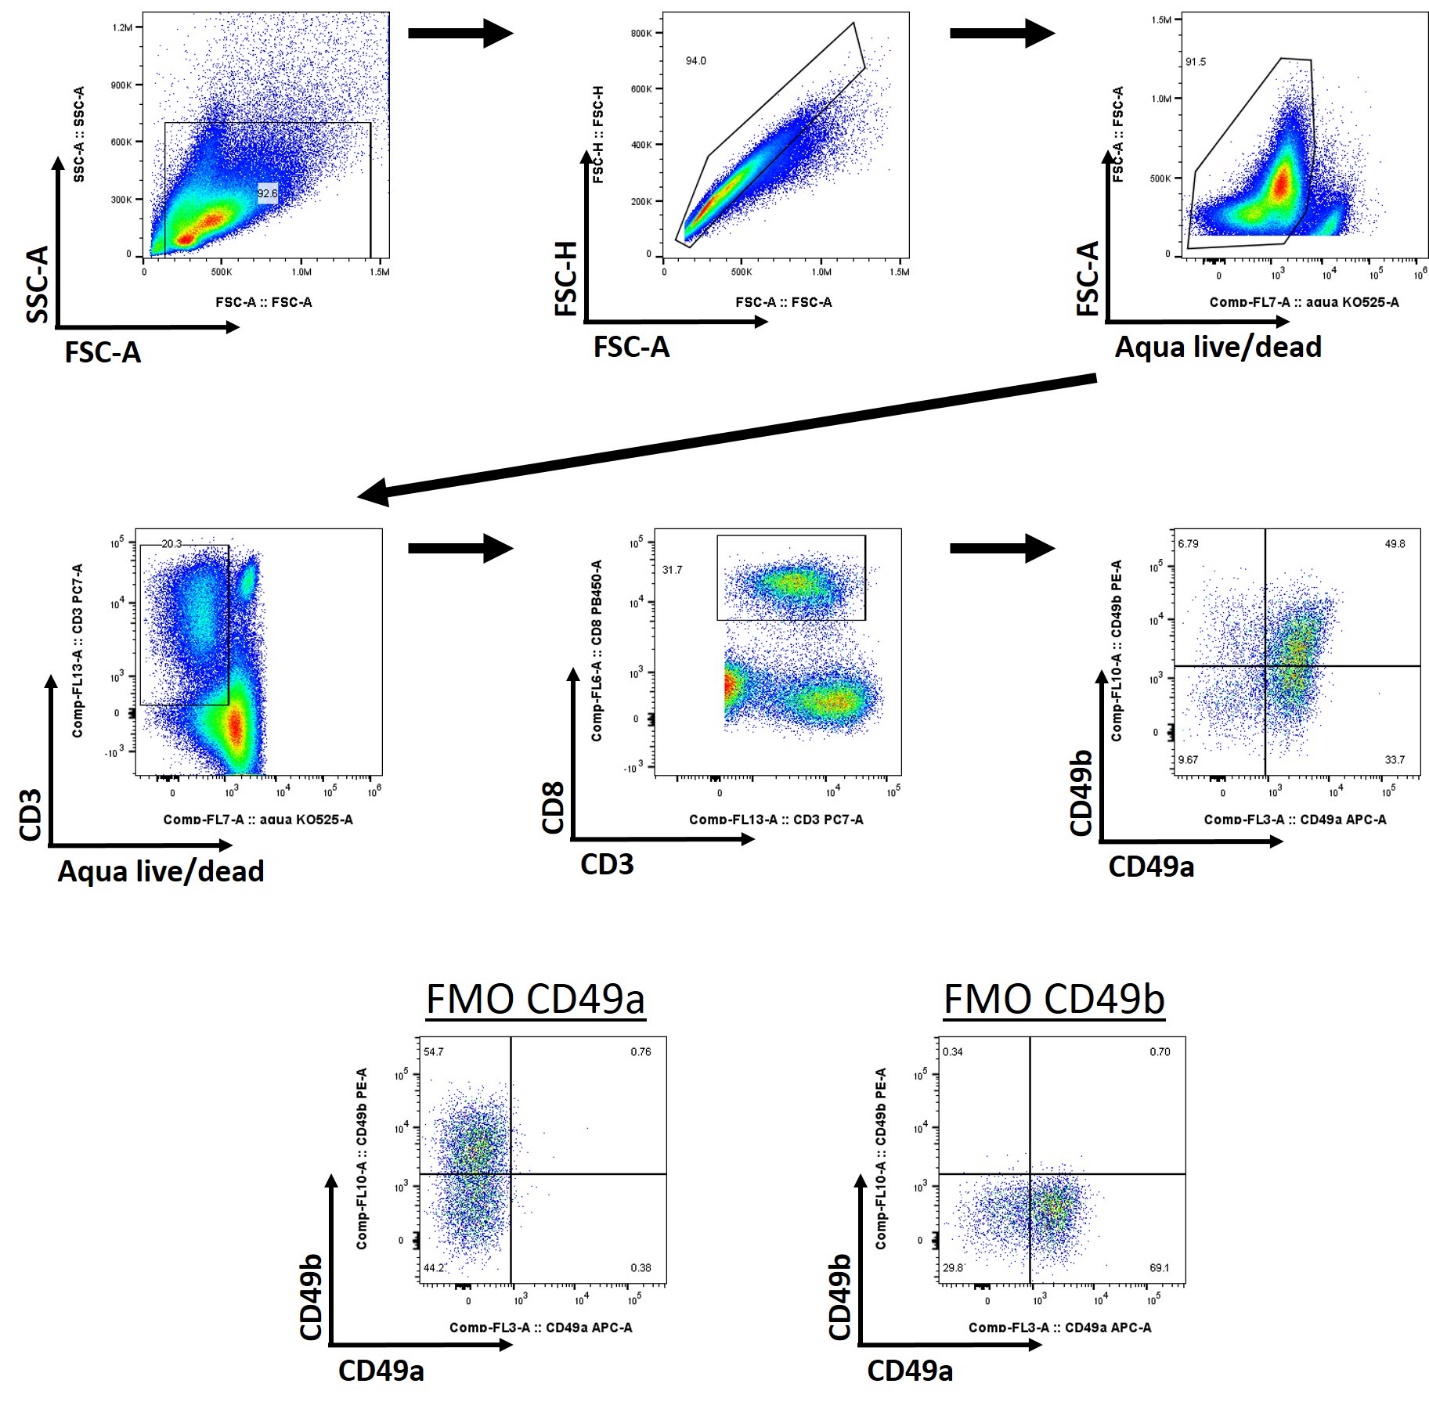


**Supplementary Figure S1.** Gating strategy for flow cytometry experiments. Debris, doublets and dead cells were excluded (top panels), CD3+ and CD8+ T cells were selected and CD49a and CD49b positivity was determined based on their respective fluorescence minus one (FMO) control samples.

**Supplementary Figure S2.** (A) 5x106 Thy1.1+ OT-I splenocytes were transferred IV into C57BL/6 mice. One day post transfer, mice were vaccinated IV with ovalbumin, polyIC and anti-CD40. Spleens of vaccinated mice were harvested 3, 5, 9, and 14 days post vaccination and analyzed for CD49a and CD49b expression on Thy1.1+ CD3+ CD8+ cells by flow cytometry. (B) C57BL/6 mice were implanted SC with BRPKp110 breast carcinoma tumors. Starting at day 14 post implantation, BRPKp110-bearing animals received daily IP injections with FTY720 or saline control. Treated tumors were harvested on day 23 and processed for flow cytometry.

**Supplementary Figure S3.** (A/B) 5x106 Thy1.1+ OT-I splenocytes were transferred IV into C57BL/6 mice. One day post transfer, mice were vaccinated IV with ovalbumin, polyIC and anti-CD40. 5 days post vaccination splenocytes were depleted for CD49a+ cells and subsequently enriched for CD49b+ cells. Enriched cells were evaluated for Thy1.1+ fraction to ensure adoptive transfer of 1x106 CD49b SP Thy1.1+ OT-I effectors. Cells were transferred IV into BRPKp110 tumor-bearing-mice. Baseline tumors were harvested on day 1 post transfer and processed for flow cytometry. Other animals received daily IP injections with FTY720 or saline control and blood samples and tumors were harvested on day 7 post transfer. (A) Blood samples were analyzed for CD3+ CD8+ cells by flow cytometry. (B) Tumor were processed into single-cell suspensions, enriched for CD45+ and analyzed for CD49b and CD49a expression on Thy1.1+ CD3+ CD8+ cells. (C) Spleens were processed into single-cell suspensions and analyzed for CD49b and CD49a expression on Thy1.1+ CD3+ CD8+ cells.


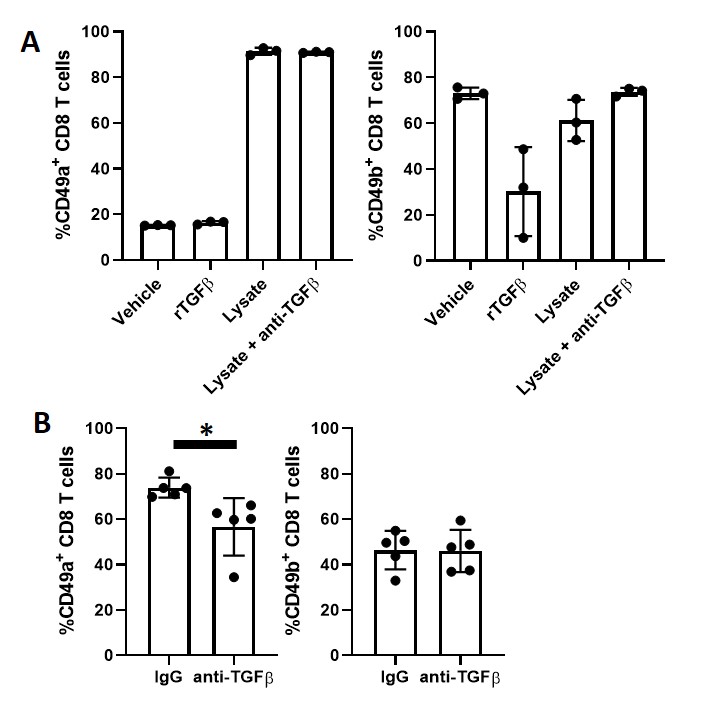


**Supplementary Figure S4. (**A) C57BL/6 mice were implanted SC with BRPKp110 breast carcinoma tumors. Mice were injected IP with anti-TGFβ1/2/3 or IgG control every 3 days between day 8-19 post tumor implantation. Tumors were harvested and single-cell suspensions were enriched for CD45+ cells. CD45 fractions were analyzed for CD49a and CD49b expression on CD3+ CD8+ cells. (B) Thy1.1+ OT-I splenocytes were enriched for CD8+ cells by magnetic bead enrichment. Cells were activated for 48 hours with CD3/CD28 activation beads and cultured for an additional 3 days in presence of IL-2 and IL-7. Next, OT-I cells were cultured for 24 hours with recombinant human TGFβ1, BRPKp110-derived tumor lysate or lysate with anti-TGFβ blocking antibodies. Cells were evaluated for CD49a (left) and CD49b (right) expression by flow cytometry.

**Supplementary Figure S5.** **Exhaustion marker expression is driven by environment and antigen-driven differentiation.** Experiments were set up as in Fig. 2A. (A) CD49b SP Thy1.1+ OT-I cells were harvested from spleens 5 days after vaccination, and transferred into tumor-free mice. Splenocytes were stained for PD-1, LAG-3 and TIM-3, prior to transfer *(left panels)* or 7 days post transfer *(right panels)* (B) Accumulated data of (A), comparing OT-I prior to transfer (n=8 from 2 independent experiments) and 7 days post transfer in tumor-free mice (n=10 from 2 independent experiments) with a Welch’s corrected T-test. (C) Activated CD49b SP Thy1.1+ OT-I cells were harvested from spleens, 5 days after vaccination and transferred into B16-OVA bearing mice (n=10 from 2 independent experiments). Seven days after transfer, spleens and tumors were harvested and Thy1.1+ OT-I cells were evaluated for PD-1, LAG3 and TIM-3 expression by flow cytometry. Expression differences between spleen and tumor were compared with a Paired T-test.

**Supplementary Figure S6.** 5x106 Thy1.1+ OT-I splenocytes were transferred IV into C57BL/6 mice. One day post transfer, mice were subcutaneously injected with B16-OVA tumor cells. Tumors were harvested on day 19 and processed for flow cytometry evaluation.

**Supplementary Figure S7.** (A) Nur77-GFP reporter mice were implanted SC with BRPKp110 breast carcinoma. Tumors and non-draining lymph nodes (NDLN) were harvested on day 14, single cell suspensions were prepared and enriched for CD45+ cells. CD45 fraction was analyzed for Nur77-GFP, CD49a and CD49b expression on CD3+ CD8+ cells. (B) C57BL/6 mice were implanted SC with BRPKp110 breast carcinoma. Tumors were harvested on day 14, single cell suspensions were prepared and enriched for CD8+ cells. Cells were cultured with CD3/CD28 stimulation beads for 4-6 hours in presence of Brefeldin A and CD107a antibody. Cells were analyzed for expression CD49a, CD49b and CD107a expression on CD3+ CD8+ cells with intracellular staining for flow cytometry. (C) Nur77-GFP reporter mice were implanted SC with BRPKp110 breast carcinoma. Mice were IP injected 48 hours prior to harvest with a checkpoint blockade inhibitor (CBI) cocktail including anti-PD1, anti-LAG3 and anti-TIM3. Tumors were harvested, single-cell suspensions were prepared and enriched for CD45+ cells. CD45 fraction was analyzed for CD49a and CD49b expression on CD3+ CD8+ cells by flow cytometry.

**Supplementary Figure S8.** (A, C) CD2-dsRed mice were implanted SC with BRPKp110-GFP tumors. Tumors were harvested on day 21/22, embedded in agarose and cut into thick slices of approximately 100-200µm. Slices were incubated with anti-CD49a or anti-CD49b blocking antibodies for 2h and assessed for CD2+ T-cells, GFP+ BRPKp110 cells and SHG-visualize collagen fibers on a 2-photon microscope. 30 min videos of 2 fields per slice were made at 37°C with flowing oxygenated media. (A) Mean track speed of each CD2+ T-cell per evaluated tumor, was measured over the course of the 30-minute video (A), and stratified by distance to GFP+ BRPKp110 tumor cells (C) for tumor 1 (left) and tumor 2 (right). Treatment groups were compared with an ordinary one-way ANOVA and Tukey’s multiple comparisons test. (B) C57BL/6 mice were implanted with BRPKp110 tumors. Day 21 tumors were harvested, fixed in 4% paraformaldehyde, cut into thin sections and stained with collagen type I or collagen type IV antibodies.

**Supplementary Figure S9.** CD2-dsRed mice were implanted SC with BRPKp110-GFP tumors. Tumors were harvested on day 21/22, embedded in agarose and cut into thick slices of approximately 100-200µm. Slices were incubated with anti-CD49a or anti-CD49b blocking antibodies for 2h and assessed for CD2+ T-cells, GFP+ BRPKp110 cells and SHG-visualize collagen fibers on a 2-photon microscope. 30 min videos of 2 fields per slice were made at 37°C with flowing oxygenated media. (A) Fraction of CD2+ T-cells are displayed per field: fraction of cells <10µm to closest GFP+ BRPKp110 tumor cell, <10µm to closest SHG-collagen fiber or <10µm to both tumor cell and collagen. (B) Mean track speed of CD2+ T-cells in each group from panel A.

**Supplementary Figure S10.** Nur77-GFP reporter mice were implanted SC with BRPKp110 (n=9 from 2 independent experiments). Mice received anti-CD49a or IgG control antibodies IV, 24 hours prior to tumor harvest on day 21. (A) Tumor weight upon harvest. (B/C) Tumors were digested into single cell suspensions and enriched CD45 fraction was analyzed for number of CD3+CD8+ T cells per gram of tumor (B), as well as CD49b expression (right panel) and CD49a epitope availability (right panel) on CD3+CD8+ T cells (C).

**Supplemental Movies S1-S3.**

Day 21/22 BRPKp110-GFP tumors implanted SC into CD2-dsRed mice were cut into slices of 100-200 microns and either left untreated (**Movie S1**), incubated with anti-CD49b (**Movie S2**) or anti-CD49 (**Movie S3**). Slices were imaged for 30 minutes and movies were composed in Imaris software to visualize motility and localization of dsRed+ T cells, GFP+ BRPKp110 cells, and SHG collagen fibers over time.
